# Supplementary material for: Thwarting of Lphn3 Functions in Cell Motility and Signaling by Cancer-Related GAIN Domain Somatic Mutations
Source: Cells. 2022 Jun 13;11(12):1913. doi: 10.3390/cells11121913 (PMC9221416; doi:10.3390/cells11121913)
Supplement: Supplementary file 1 [file cells-11-01913-s001.zip]

Archive with 6 entries (6 files):
- Cell line choice justification.pdf
- Supplementary figure and video legends.pdf
- Video S1.mp4
- Video S2.mp4
- Video S3.mp4
- Video S4.mp4
